# Supplementary material
Source: PubMed Central journal article supplement (PMC3225987)
Supplement: JCI45797sd.pdf [file JCI45797sd.pdf]

## Supplemental Figures

A

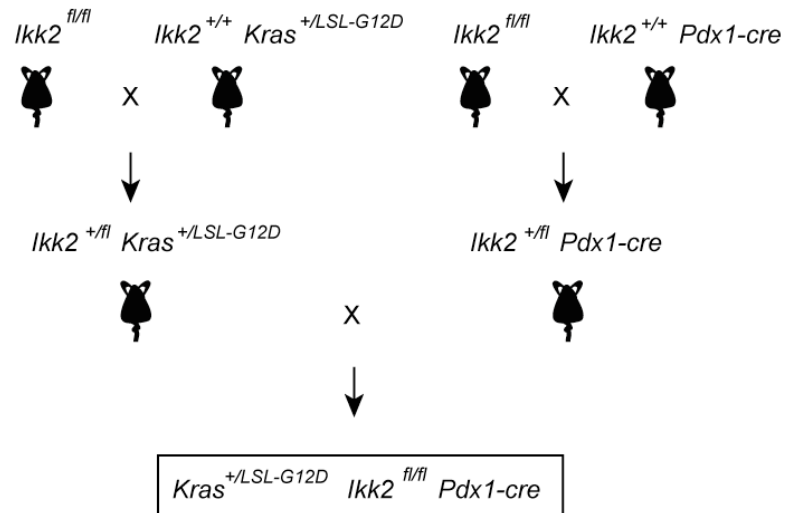

B

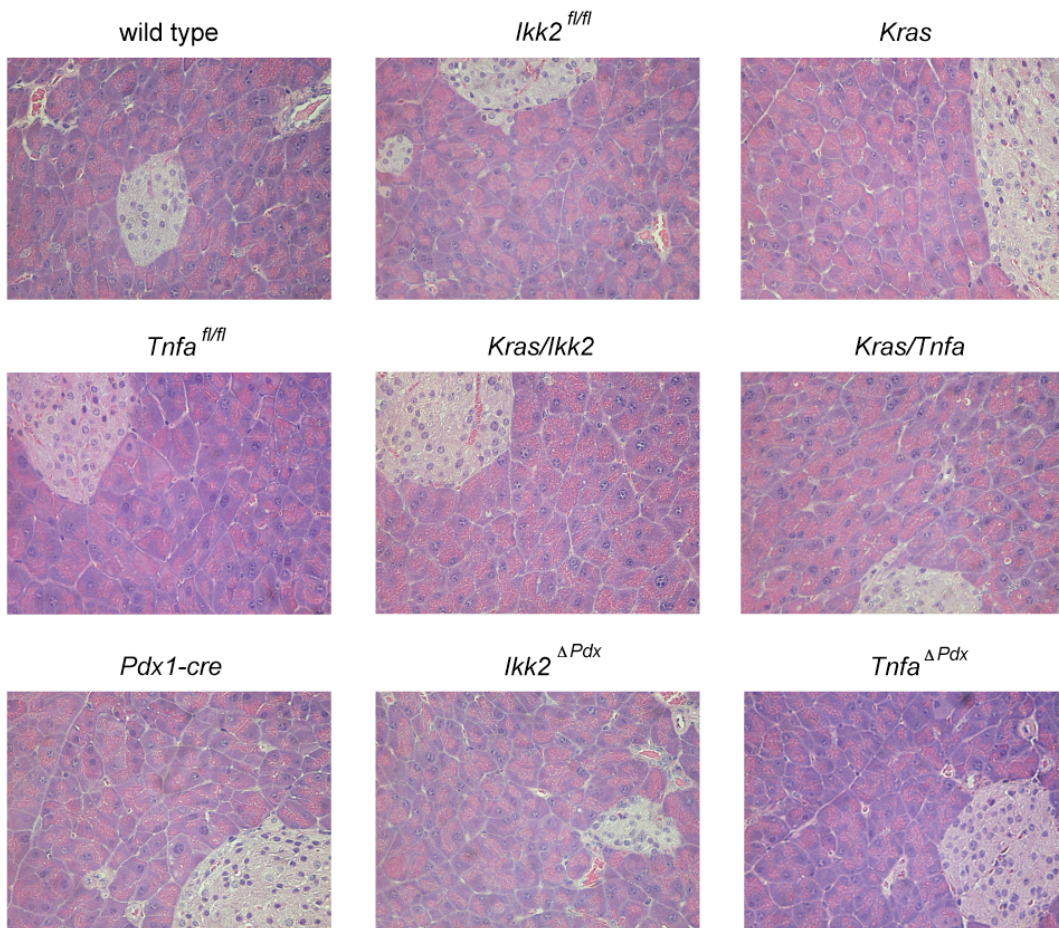

Supplemental Figure 1. Generation of  $Kras^{G12D}$  mice with targeted deletion of  $Ikk2$  or  $Tnfa$ . (A)  $Kras^{+LSL-G12D}$  and  $Pdx1-cre$  mice were crossed

with the *Ikk2<sup>fl/fl</sup>* strain. The progeny was intercrossed to generate *Kras<sup>G12D</sup>Ikk2<sup>ΔPdx</sup>*. *Kras<sup>G12D</sup>Ikk2<sup>ΔPdx</sup>* were developed by a similar strategy. **(B)** H&E stained sections of pancreases from the indicated strains at 5 months of age. No signs of major abnormalities were detected in the pancreases of the indicated strains. Magnification x20.

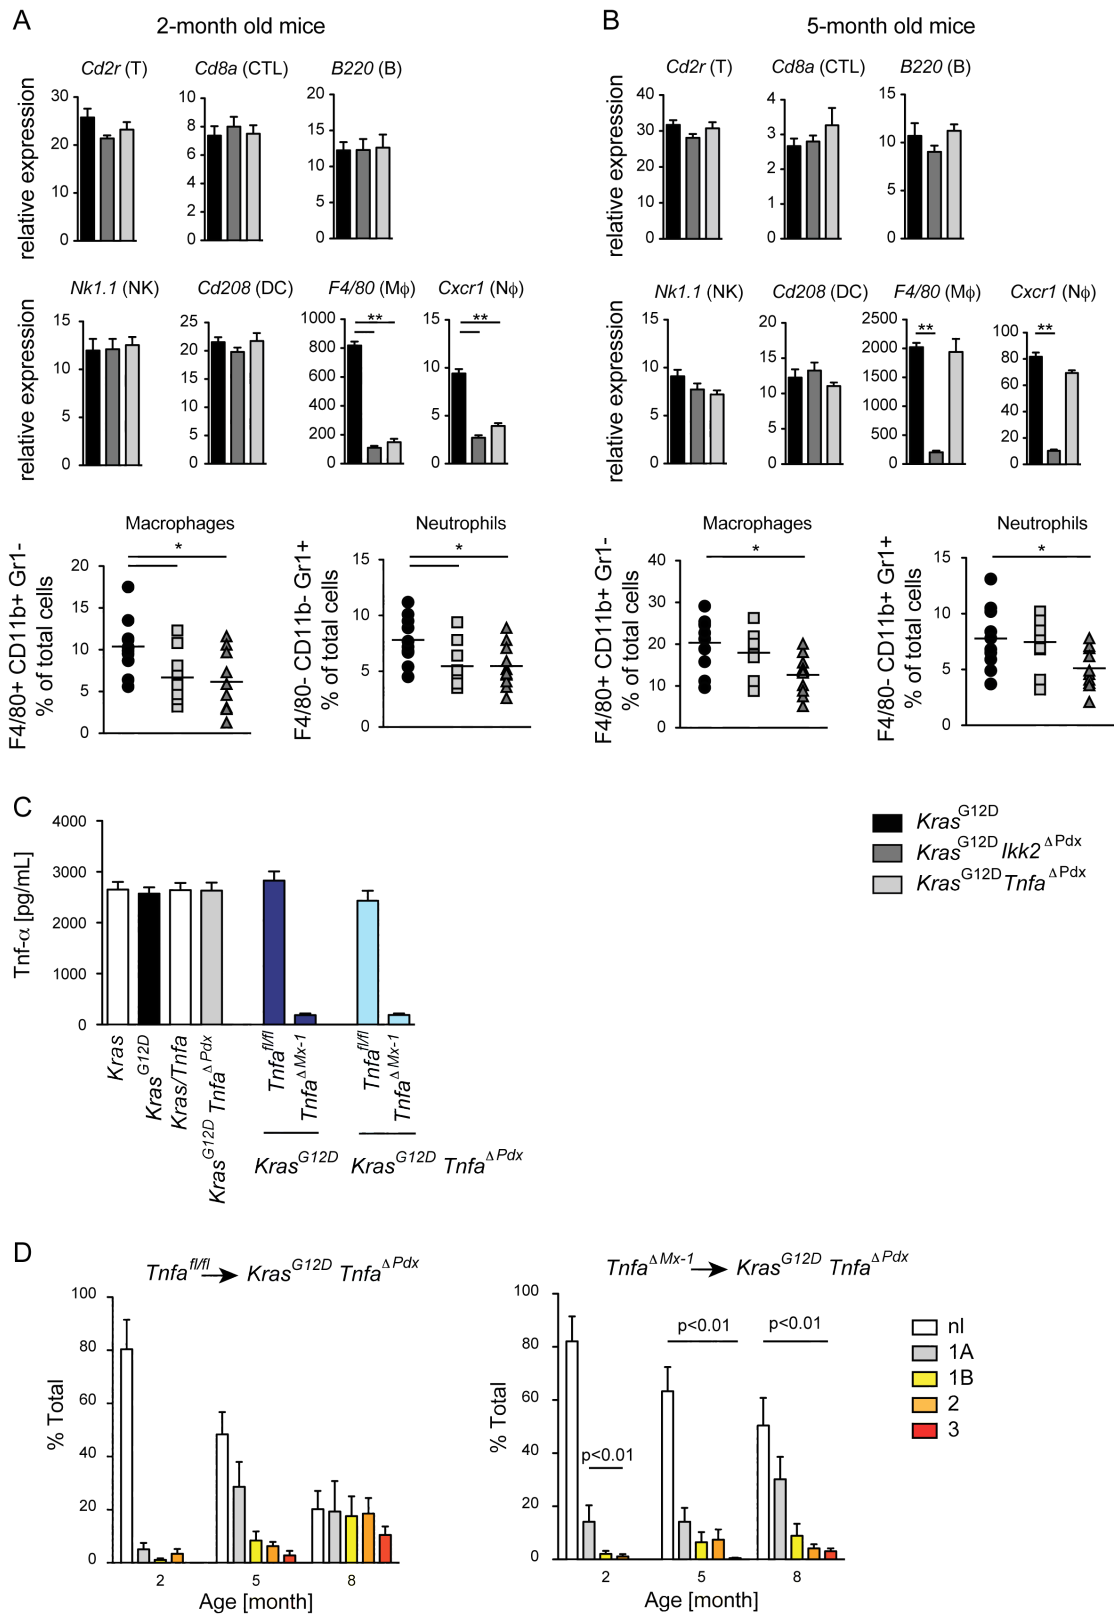

**Supplemental Figure 2. Genetic inactivation of the Tnf- $\alpha$ /Ikk2 axis in Kras induced pancreatic epithelial cells abrogates pancreas-specific infiltration of inflammatory cells.** Relative mRNA expression of *Cd2r*, *Cd8a*, *B220*, *Nk1.1*, *Cd208*, *F4/80* and *Cxcr1* in whole pancreases of (A) 2- and (B) 5-month old mice. Gene expression was quantified by real-time PCR normalized to mRNA levels of  $\beta$ -Actin. Percentage of F4/80<sup>+</sup>CD11b<sup>+</sup>Gr1<sup>-</sup> and F4/80<sup>-</sup>CD11b<sup>+</sup>Gr1<sup>+</sup> cells in the pancreas measured by flow cytometry. Each data point represents an individual mouse. Mean values are depicted by a horizontal line. Means + SD (n=8), \*p<0.05, \*\*p<0.01. (C) Six weeks old *Kras*<sup>G12D</sup> and *Kras*<sup>G12D</sup>*Tnfa* <sup>$\Delta$ Pdx</sup> female mice were lethally irradiated and transplanted with bone marrow of female *Tnfa*<sup>fl/fl</sup> or *Tnfa*<sup>fl/fl</sup>*Mx-1-Cre* mice (n=10 each group). Mice were thrice injected with 5  $\mu$ g/g body weight poly(I:C) to delete *Tnfa* in 2-month old mice. Deletion was examined by Tnf- $\alpha$  ELISA of blood leukocytes upon *ex vivo* LPS stimulation. (D) Quantification of the proportion of pancreas occupied by PanIN lesions. Frequency and grade of the lesions was quantified at 2, 5 and 8 months of age. Means + SD (n=10), p<0.01. nl, no lesion.

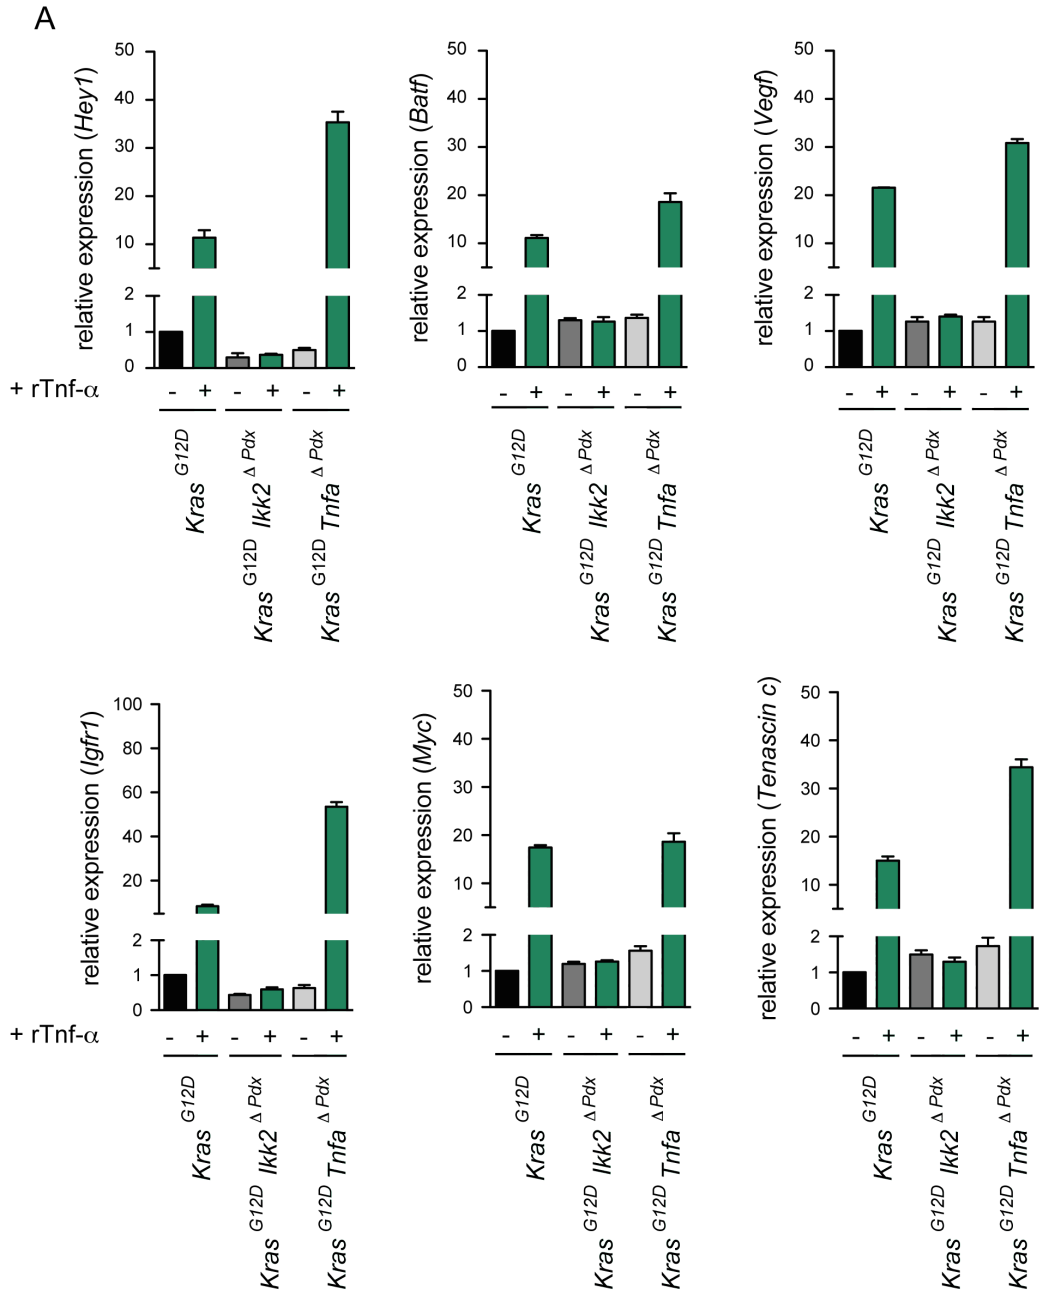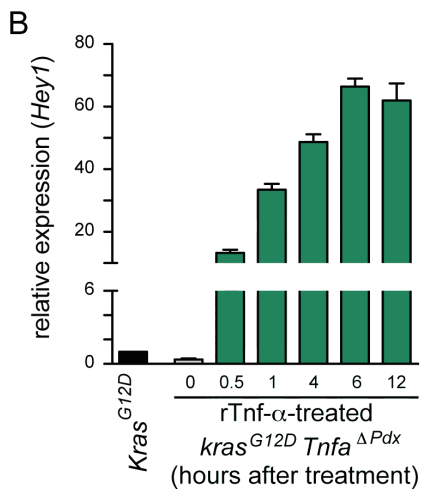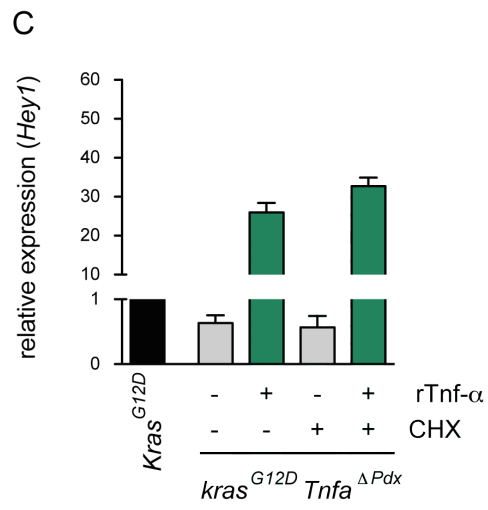

**Supplemental Figure 3. Tnf- $\alpha$ -induced Notch and NF- $\kappa$ B target gene expression in PanIN cell lines.** (A) Relative mRNA expression of *Hey1*, *Batf*, *Vegf*, *Igfr1*, *Myc* and *Tenascin c* in PanIN cell lines stimulated with 1 ng/ml rTnf- $\alpha$  for 6 h. Relative expression was calculated by setting expression of untreated *kras*<sup>G12D</sup> samples as 1. Data are shown as means + SD of triplicate determinants and one representative experiment out of three is shown. (B) Kinetic analysis of *Hey1* mRNA expression in *kras*<sup>G12D</sup>*Tnfa* <sup>$\Delta$ Pdx</sup> PanIN cell lines stimulated with 1 ng/ml rTnf- $\alpha$ . (C) Expression of *Hey1* in *Kras*<sup>G12D</sup>*Tnfa* <sup>$\Delta$ Pdx</sup> PanIN cells treated with 1 ng/ml rTnf- $\alpha$  in the presence or absence of 15  $\mu$ g/ml CHX. Relative expression was calculated by setting expression of untreated *Kras*<sup>G12D</sup> samples as 1. Data are shown as means + SD of triplicate determinants and one representative experiment out of three is shown.

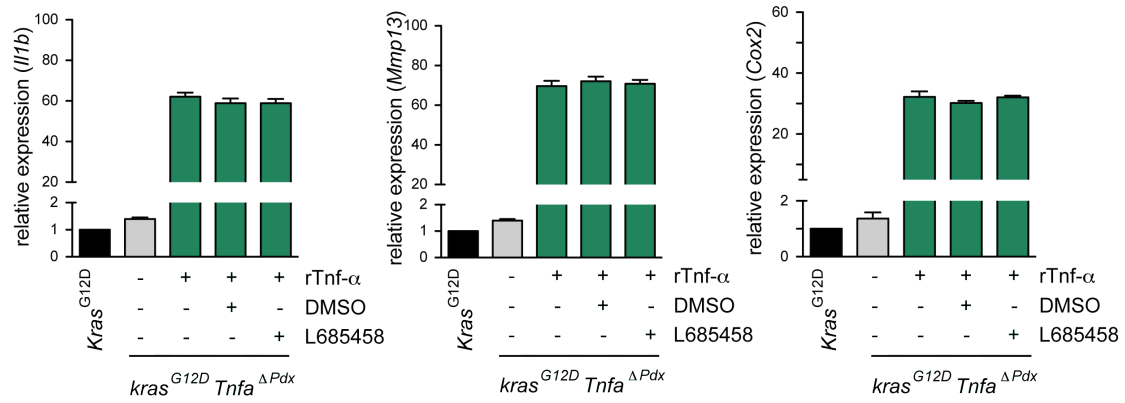

**Supplemental Figure 4. Tnf- $\alpha$  induced NF- $\kappa$ B target genes expression is not affected by pharmacological inhibition of Notch signaling.** Expression of *Il1b*, *Mmp13* and *Cox2* in Tnf- $\alpha$ -induced *Kras*<sup>G12D</sup>*Tnfa*<sup>ΔPdx</sup> PanIN cells treated with the  $\gamma$ -secretase inhibitor L685458 (5 $\mu$ M). Cells were stimulated with 1 ng/ml rTnf- $\alpha$ . Relative expression was calculated by setting expression of untreated *Kras*<sup>G12D</sup> samples as 1. Data are shown as means + SD of triplicate determinants and one representative experiment out of three is shown.

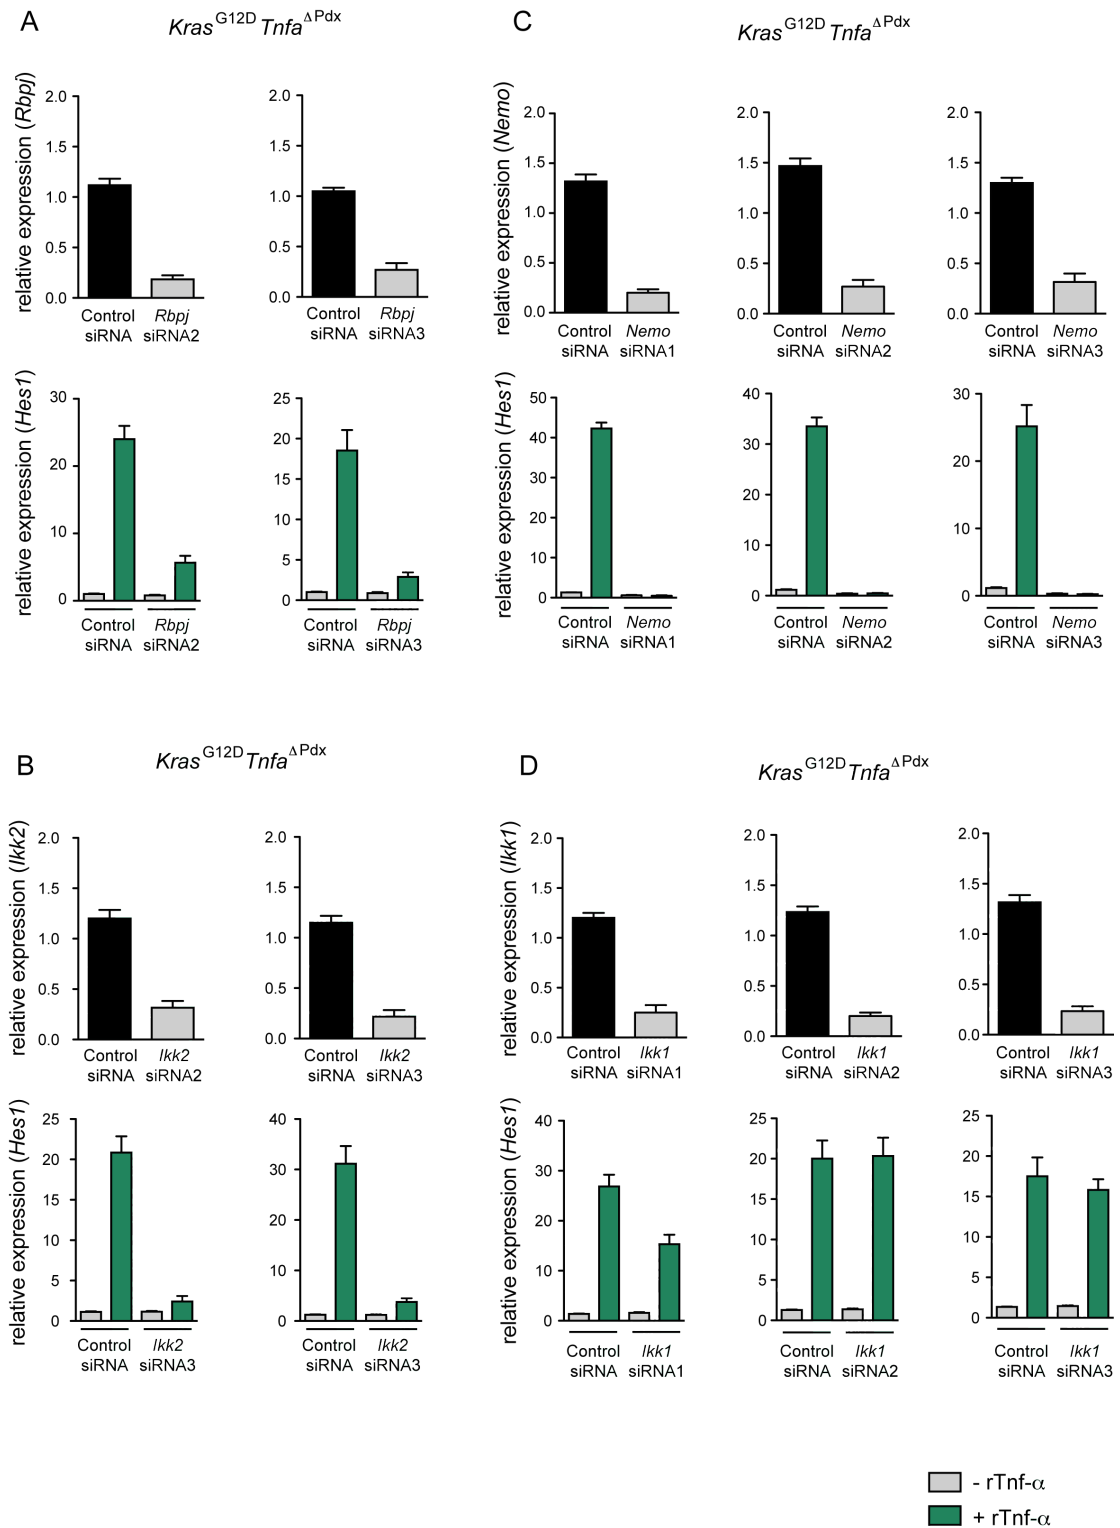

**Supplemental Figure 5. siRNA knockdown of *Rbpj*, *Ikk2*, *Nemo* and *Ikk1* in *Kras<sup>G12D</sup>Tnfa<sup>ΔPdx</sup>* cells. *Kras<sup>G12D</sup>Tnfa<sup>ΔPdx</sup>* PanIN cell lines transfected with (A) *Rbpj*, (B) *Ikk2*, (C) *Nemo* and (D) *Ikk1* specific siRNAs. Gene expression was evaluated 48 h post transfection and upon stimulation with 1 ng/ml rTnf-α**



for 6 h. Non-targeting siRNA and/or unstimulated controls were included. Results were normalized to uninfected and unstimulated *Kras*<sup>G12D</sup>*Tnfa*<sup>ΔPdx</sup> cells. Data are shown as means + SD of triplicate determinants and are representative of three independent experiments.

A

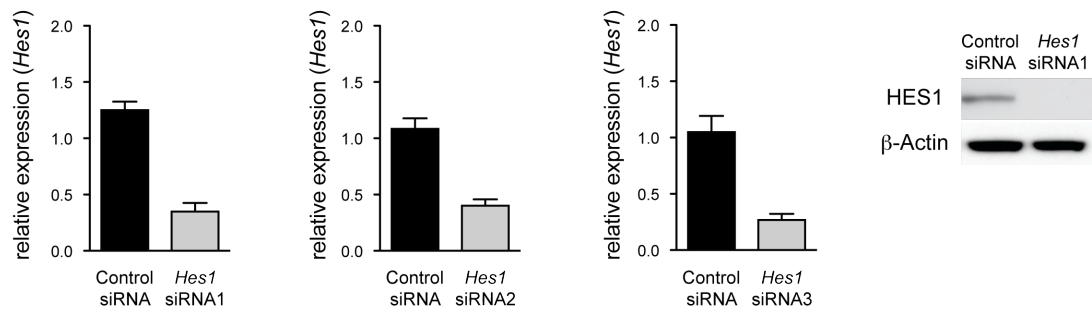

B

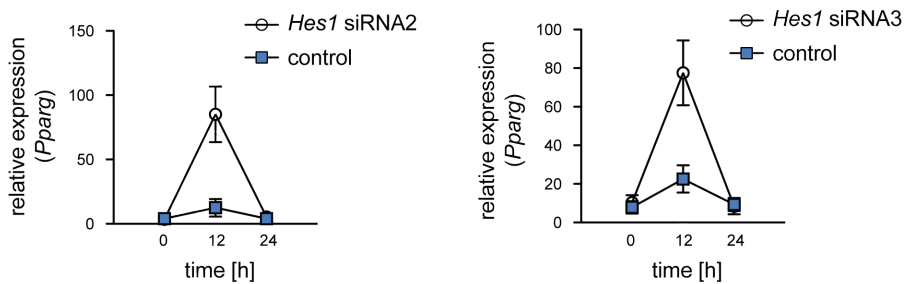

C

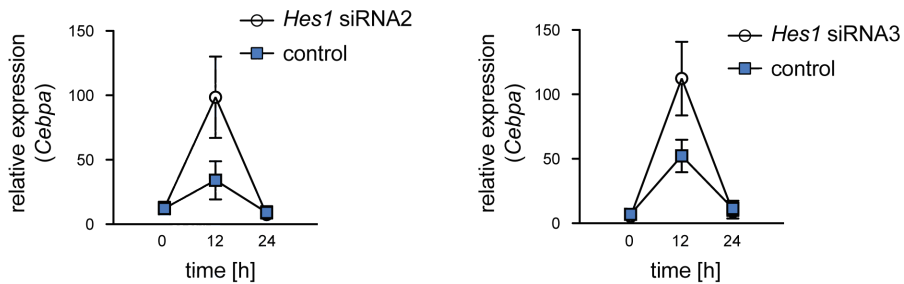

**Supplemental Figure 6. siRNA knockdown of *Hes1* results in upregulated *Pparg* and *Cebpa* expression.** (A) Downregulation of *Hes1* in *Kras*<sup>G12D</sup>*Tnfa*<sup>ΔPdx</sup> PanIN cell lines transfected with *Hes1* specific siRNAs. Results were normalized to uninfected *Kras*<sup>G12D</sup>*Tnfa*<sup>ΔPdx</sup> cells. (B) *Pparg* and (C) *Cebpa* downregulation in cells transfected with *Hes1* siRNA2 and siRNA3. Data are shown as means + SD of triplicate determinants and are representative of three independent experiments.

| ID       | Age (days) | PDAC | Histology            | Liver | Lung | PD   | Ascites | BO  | Other |
|----------|------------|------|----------------------|-------|------|------|---------|-----|-------|
| TH04-75  | 523        | Y    | undifferentiated     | Y     | N    | N    | N       | Y   |       |
| TH04-81  | 514        | Y    | undifferentiated     | Y     | N    | Y    | N       | N   | LN    |
| TH04-83  | 584        | N    |                      | N     | N    | N    | N       | N   |       |
| TH04-111 | 408        | N    |                      | N     | N    | N    | N       | N   |       |
| TH04-121 | 447        | Y    | undifferentiated     | Y     | N    | Y    | N       | N   | LN    |
| TH04-122 | 432        | N    |                      | N     | N    | N    | N       | N   |       |
| TH04-128 | 522        | Y    | undifferentiated     | Y     | Y    | N    | N       | N   |       |
| TH04-175 | 167        | N    |                      | N     | N    | N    | N       | N   |       |
| TH04-177 | 185        | N    |                      | N     | N    | N    | N       | N   |       |
| TH04-190 | 224        | N    |                      | N     | N    | N    | N       | N   |       |
| TH04-195 | 364        | Y    | glandular            | N     | N    | N    | Y       | Y   |       |
| TH04-198 | 361        | Y    | glandular            | N     | N    | N    | Y       | Y   |       |
| TH04-224 | 301        | Y    | undifferentiated     | Y     | Y    | N    | N       | N   |       |
| TH04-230 | 254        | N    |                      | N     | N    | N    | N       | N   |       |
| TH04-234 | 485        | N    |                      | N     | N    | N    | N       | N   |       |
| TH04-236 | 203        | N    |                      | N     | N    | N    | N       | N   |       |
| TH04-248 | 308        | N    |                      | N     | N    | N    | N       | N   |       |
| TH04-249 | 388        | Y    | undifferentiated     | Y     | N    | Y    | N       | Y   |       |
| TH04-255 | 365        | Y    | undifferentiated     | Y     | Y    | N    | N       | N   |       |
| TH04-269 | 214        | Y    | undifferentiated     | Y     | N    | N    | Y       | N   |       |
| TH04-271 | 394        | Y    | glandular            | N     | N    | N    | N       | Y   |       |
| TH04-274 | 575        | Y    | undifferentiated     | Y     | N    | N    | N       | N   |       |
| TH04-277 | 564        | N    |                      | N     | N    | N    | N       | N   |       |
| TH04-294 | 467        | N    |                      | N     | N    | N    | N       | N   |       |
| TH04-312 | 481        | Y    | undifferentiated     | Y     | N    | N    | N       | Y   |       |
| TH04-318 | 348        | N    |                      | N     | N    | N    | N       | N   |       |
| TH04-324 | 506        | Y    | undifferentiated     | Y     | Y    | N    | N       | N   |       |
| TH04-328 | 407        | N    |                      | N     | N    | N    | N       | N   |       |
| TH04-351 | 519        | N    |                      | N     | N    | N    | N       | N   |       |
| TH04-361 | 522        | N    |                      | N     | N    | N    | N       | N   |       |
| TH04-366 | 413        | Y    | glandular            | N     | N    | N    | Y       | Y   |       |
| TH04-367 | 497        | N    |                      | N     | N    | N    | N       | N   |       |
| TH04-372 | 463        | Y    | undifferentiated     | Y     | N    | N    | Y       | N   |       |
| TH04-373 | 482        | Y    | undifferentiated     | Y     | Y    | N    | N       | Y   |       |
| TH04-385 | 506        | Y    | undifferentiated     | Y     | N    | N    | N       | N   |       |
| TH04-386 | 322        | N    |                      | N     | N    | N    | N       | N   |       |
| TH04-387 | 471        | Y    | glandular            | N     | N    | N    | N       | Y   |       |
| TH04-402 | 449        | Y    | undifferentiated     | Y     | Y    | N    | N       | Y   |       |
| TH04-406 | 367        | N    |                      | N     | N    | N    | N       | N   |       |
| TH04-425 | 308        | N    |                      | N     | N    | N    | N       | N   |       |
|          |            |      |                      |       |      |      |         |     |       |
|          | Median     |      | 75% undifferentiated |       |      |      |         |     |       |
|          | 422.5      | 50%  | 25% glandular        | 37.5% | 15%  | 7.5% | 12.5%   | 25% |       |

**Supplemental Table 1. Disease spectrum in *Kras*<sup>G12D</sup>**

PD, peritoneal disease; BO, biliary obstruction
